# Supplementary material for: Association of Grip Strength with Quality of Life in the Chinese Oldest Old
Source: MDPI journal article supplement (doi:10.3390/ijerph182312394), 2021-11-25
Supplement: s1 [file s1]

**Table S1.** Results of the fully adjusted models on the associations of grip strength with overall and specific domain of QOL.

|                                                                                 | Overall QOL                 | SAB                            | AUT                          | PPF                         | SOP                         | DAD                         | INT                            |
|---------------------------------------------------------------------------------|-----------------------------|--------------------------------|------------------------------|-----------------------------|-----------------------------|-----------------------------|--------------------------------|
|                                                                                 | $\beta$<br>(95%CI)          | $\beta$<br>(95%CI)             | $\beta$<br>(95%CI)           | $\beta$<br>(95%CI)          | $\beta$<br>(95%CI)          | $\beta$<br>(95%CI)          | $\beta$<br>(95%CI)             |
| Middle grip strength (vs. low grip strength)                                    | <b>2.04</b><br>(0.23, 3.85) | 4.01<br>(-0.01, 8.02)          | 1.70<br>(-1.08, 4.48)        | 1.62<br>(-0.52, 3.76)       | <b>3.60</b><br>(0.91, 6.29) | 2.41<br>(-0.99, 5.82)       | -1.09<br>(-4.28, 2.10)         |
| High grip strength (vs. low grip strength)                                      | <b>4.40</b><br>(2.40, 6.40) | 4.29<br>(-0.14, 8.73)          | <b>6.73</b><br>(3.66, 9.81 ) | <b>3.52</b><br>(1.15, 5.88) | <b>6.72</b><br>(3.75, 9.69) | 2.86<br>(-0.91, 6.62)       | 2.09<br>(-1.23, 5.82)          |
| Age                                                                             | -0.09<br>(-0.29, 0.12)      | <b>-0.51</b><br>(-0.96, -0.06) | -0.14<br>(-0.46, 0.17)       | -0.15<br>(-0.39, 0.09)      | -0.12<br>(-0.43, 0.18)      | <b>0.52</b><br>(0.14, 0.91) | -0.11<br>(-0.46, 0.25)         |
| Female (vs. male)                                                               | -0.54<br>(-2.19, 1.11)      | 1.53<br>(-2.13, 5.19)          | -0.11<br>(-2.65, 2.42)       | -0.68<br>(-2.64, 1.27)      | -2.11<br>(-4.56, 0.34)      | -1.61<br>(-4.72, 1.50)      | -0.27<br>(-3.18, 2.64)         |
| Education: Middle school (vs. elementary school or less)                        | 1.16<br>(-0.71, 3.03)       | 1.80<br>(-2.36, 5.96)          | 0.88<br>(-2.00, 2.42 )       | <b>3.80</b><br>(1.59, 6.01) | 1.29<br>(-1.49, 4.08)       | -0.95<br>(-4.47, 2.58)      | 0.14<br>(-3.16, 3.44)          |
| Education: Associate degree or college or above (vs. elementary school or less) | 1.56<br>(-0.61, 3.73)       | 2.41<br>(-2.39, 7.22)          | 2.78<br>(-1.05, 5.61)        | <b>3.58</b><br>(1.02, 6.14) | 2.56<br>(-0.66, 5.77)       | -2.42<br>(-6.51, 1.65)      | 0.98<br>(-2.84, 4.80)          |
| Married (vs. unmarried)                                                         | -0.06<br>(-1.84, 1.73)      | 2.64<br>(-1.32, 6.60)          | 0.03<br>(-2.71, 2.78)        | -1.74<br>(-3.85, 0.37)      | -2.30<br>(-4.95, 0.35)      | -0.69<br>(-4.05, 2.67)      | 1.72<br>(-1.43, 4.87)          |
| Living alone (vs. living with others)                                           | -0.04<br>(-2.28, 2.20)      | 0.31<br>(-4.65, 5.27)          | 1.43<br>(-2.01, 4.87)        | 0.43<br>(-2.22, 3.07)       | -0.75<br>(-4.07, 2.57)      | 3.40<br>(-0.81, 7.61)       | <b>-5.04</b><br>(-8.99, -1.10) |
| Comorbidity: Two (vs. one or less)                                              | -1.96<br>(-4.06, 0.14)      | 0.25<br>(-4.40, 4.90)          | -3.61<br>(-6.83, -0.38)      | -1.16<br>(-3.64, 1.32)      | -1.52<br>(-4.64, 1.59)      | -2.74<br>(-6.69, 1.21)      | -2.97<br>(-6.67, 0.72)         |
| Comorbidity: Three or                                                           | -1.81                       | -0.90                          | <b>-3.57</b>                 | 0.92                        | -1.42                       | <b>-4.16</b>                | -1.71                          |

|                            |                |                 |                  |                |                 |                |                |
|----------------------------|----------------|-----------------|------------------|----------------|-----------------|----------------|----------------|
| more (vs. one or less)     | (-3.91, 0.29)  | (-5.56, 3.77)   | (-6.80, -0.34)   | (-1.56, 3.41)  | (-4.54, 1.70)   | (-8.12, -0.21) | (-5.41,1.99)   |
| Polypharmacy (vs. no)      | -4.14          | -3.16           | <b>-4.36</b>     | <b>-3.47</b>   | <b>-5.34</b>    | <b>-3.72</b>   | <b>-4.80</b>   |
|                            | (-5.82, -2.47) | (-6.87, 0.55)   | (-6.93, -1.78)   | (-5.44, -1.49) | (-7.83, -2.86)  | (-6.87, -0.57) | (-7.75, -1.85) |
| ADL/IADL disabilities (vs. | <b>-7.22</b>   | <b>-7.58</b>    | <b>-12.91</b>    | <b>-5.73</b>   | <b>-11.03</b>   | -2.79          | <b>-3.29</b>   |
| Independency)              | (-9.06, -5.38) | (-11.65, -3.50) | (-15.73, -10.08) | (-7.90, -3.56) | (-13.75, -8.30) | (-6.25, 0.67)  | (-6.52, -0.05) |
| Depressed (vs. normal)     | <b>-4.35</b>   | <b>-6.39</b>    | <b>-3.78</b>     | <b>-3.78</b>   | <b>-6.99</b>    | -1.77          | <b>-3.43</b>   |
|                            | (-6.05, -2.67) | (-10.14, -2.64) | (-6.38, -1.19)   | (-5.77, -1.78) | (-9.50, -4.48)  | (-4.94, 1.41)  | (-6.41, -0.46) |
| Loneliness                 | <b>-0.71</b>   | -0.49           | <b>-0.45</b>     | -0.89          | <b>-0.49</b>    | <b>-0.50</b>   | <b>-1.42</b>   |
|                            | (-0.94, -0.47) | (-0.99,0.02)    | (-0.80, -0.10)   | (1.16, -0.62)  | (-0.83, -0.15)  | (-0.94, -0.07) | (-1.83, -1.02) |
| Cognitive impairment       | <b>-4.79</b>   | <b>-7.76</b>    | <b>-6.51</b>     | <b>-4.28</b>   | <b>-4.87</b>    | -1.67          | <b>-3.63</b>   |
| (vs. normal)               | (-6.34, -3.23) | (-11.20, -4.30) | (-8.90, -4.11)   | (-6.12, -2.44) | (-7.19, -2.56)  | (-4.61, 1.26)  | (-6.38, -0.89) |

Note: Bold font indicating  $p < 0.05$ ; SAB=sensory functioning; AUT=autonomy; PPF=past, present and future activities; SOP=social participation; DAD=death and dying; INT=intimacy.
